# Supplementary material
Source: PubMed Central journal article supplement (PMC4837024)
Supplement: NIHMS746508-supplement-2.pdf [file NIHMS746508-supplement-2.pdf]

|          |           |          |          |         |          |         |
|----------|-----------|----------|----------|---------|----------|---------|
| APEX1    | CPSF3     | FMR1     | INTS2    | NUP153  | RNF10    | TARS    |
| AAK1     | CPT1A     | FOXK2    | INTS4    | NUP205  | RNF40    | TARS2   |
| ABCF3    | CRKL      | GAPDH    | INTS6    | NUP210  | RPAP3    | TBC1D31 |
| ABLIM1   | CSPP1     | GARS     | INTS8    | NUP214  | RPL6     | TCF12   |
| ACO2     | CSTF3     | GFPT1    | IPO11    | NUP93   | RPLP0    | THEMIS  |
| ACSL4    | CTNNA1    | GNAI2    | KARS     | PABPC1  | RPS6KA1  | THOC1   |
| ACTB     | CTTNBP2NI | GNB1     | KBTBD11  | PABPC4  | RPSA     | THOC5   |
| ADD3     | CUL2      | GRIPAP1  | KCNAB2   | PARD3   | RPTOR    | TIMM50  |
| ADNP     | CUL3      | GSPT1    | KDM5A    | PCBP2   | RRM1     | TMPO    |
| ADRBK1   | CUL4B     | GTF3C3   | KHSRP    | PDIA4   | SART3    | TPP2    |
| ADRBK2   | DDX1      | GTPBP1   | KIF2C    | PDS5B   | SATB1    | TPR     |
| AFG3L2   | DDX17     | HBS1L    | KIF3A    | PFKP    | SEC13    | TRAP1   |
| AIP      | DDX26B    | HCFC1    | KPNB1    | PHLDB3  | SEC23A   | TRIM56  |
| AKR1B1   | DDX50     | HDGF     | LASP1    | PHRF1   | SEC23B   | TUBA1C  |
| ANKRD13A | DDX51     | HIRIP3   | LETM1    | PIK3C3  | SEC23IP  | TUBB    |
| ANXA1    | DGKA      | HNRNPA0  | LRCH4    | PLAA    | SET      | TXLNA   |
| ANXA2    | DGKZ      | HNRNPA1  | LRRCC1   | POLG    | SHKBP1   | UBA1    |
| ANXA6    | DHX15     | HNRNPA2B | MAN1B1   | POLRMT  | SKIV2L   | VANGL1  |
| ARHGEF7  | DNAJC2    | HNRNPAB  | MARCKSL1 | POM121C | SKIV2L2  | VARS    |
| ARID4B   | DTL       | HNRNPH3  | MARK3    | PPIG    | SLMAP    | VCP     |
| ASUN     | EEF1A1    | HNRNPR   | MCM5     | PPP1CB  | SMC5     | VPS11   |
| ATP2A3   | EIF2B5    | HOOK3    | MCM7     | PPP2CB  | SMEK1    | VPS35   |
| BAHCC1   | EIF3A     | HP1BP3   | MED23    | PPP2R1A | SMEK2    | WDR70   |
| BBS2     | EIF3I     | HPS6     | MFN2     | PPP2R4  | SMPD4    | WRNIP1  |
| BCL11B   | EIF3M     | HRNR     | MLH1     | PPP4R1  | SORD     | XRCC1   |
| BPNT1    | EIF4B     | HSD17B4  | MORC3    | PRKCA   | SPATA5L1 | XRCC5   |
| CAND2    | EIF4G1    | HSP90AA1 | MSN      | PRKCB   | SRP72    | XRCC6   |
| CAPZA1   | ELAVL1    | HSP90AB1 | MTA1     | PRKCH   | SSH1     | ZFP91   |
| CCDC14   | ELMO1     | HSPA5    | MX2      | PRKCQ   | STAT1    | ZNF217  |
| CCDC6    | ENO1      | HSPA8    | MYB      | PRKD2   | STAT3    |         |
| CCNT1    | EPB41L2   | HSPA9    | NCBP1    | PUM1    | STIM1    |         |
| CD2AP    | ERAP1     | IDH3A    | NDC1     | QARS    | STRBP    |         |
| CDK6     | EWSR1     | IDH3B    | NFATC3   | RALY    | STRIP1   |         |
| CEP120   | EXOC3     | IFI16    | NOP2     | RANGAP1 | STRIP2   |         |
| CEP135   | EZR       | IK       | NPM1     | RBM14   | STRN     |         |
| CEP78    | FAF1      | IKZF1    | NSF      | RCSD1   | STRN3    |         |
| CEP95    | FAM160B1  | IL16     | NUCKS1   | RFC2    | STRN4    |         |
| CHUK     | FBL       | ILF3     | NUFIP2   | RFC5    | SUMO1    |         |
| CLINT1   | FDPS      | IMMT     | NUP107   | RFTN1   | SUN2     |         |
| COPS6    | FERMT3    | INTS1    | NUP133   | RNASEL  | TALDO1   |         |

### Supplementary Table 1.

**PP2A<sub>C</sub>-interacting proteins after ceramide-mediated PP2A activation.**
